# Supplementary material for: HMGN1 and R848 Synergistically Activate Dendritic Cells Using Multiple Signaling Pathways
Source: PubMed Central journal article supplement (PMC6305469; doi:10.3389/fimmu.2018.02982), 2018-12-18
Supplement: Data_Sheet_1.pdf [file Data_Sheet_1.pdf]

1 **Supplementary Material**

2

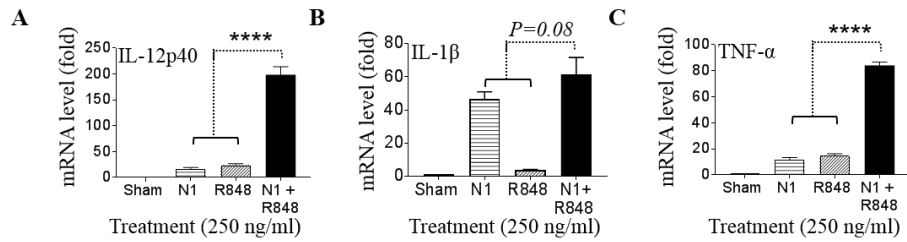

3

4 **Figure S1.** Human MoDCs at  $5 \times 10^5$  cells/ml were treated with N1 (250 ng/ml) and/or R848 (250  
 5 ng/ml) for 6 h before extraction of total RNA. The levels of (A) IL-12p40, (B) IL-1 $\beta$ , and (C)  
 6 TNF- $\alpha$  were quantitated by qPCR and shown as a fold increase over the sham treated basal level.  
 7 Data are shown as the average (mean  $\pm$  SD) of triplicates of one experiment representative of three.  
 8 \*\*\*\* $p < 0.0001$  according to one-way ANOVA followed by Tukey's post hoc test.

9

10

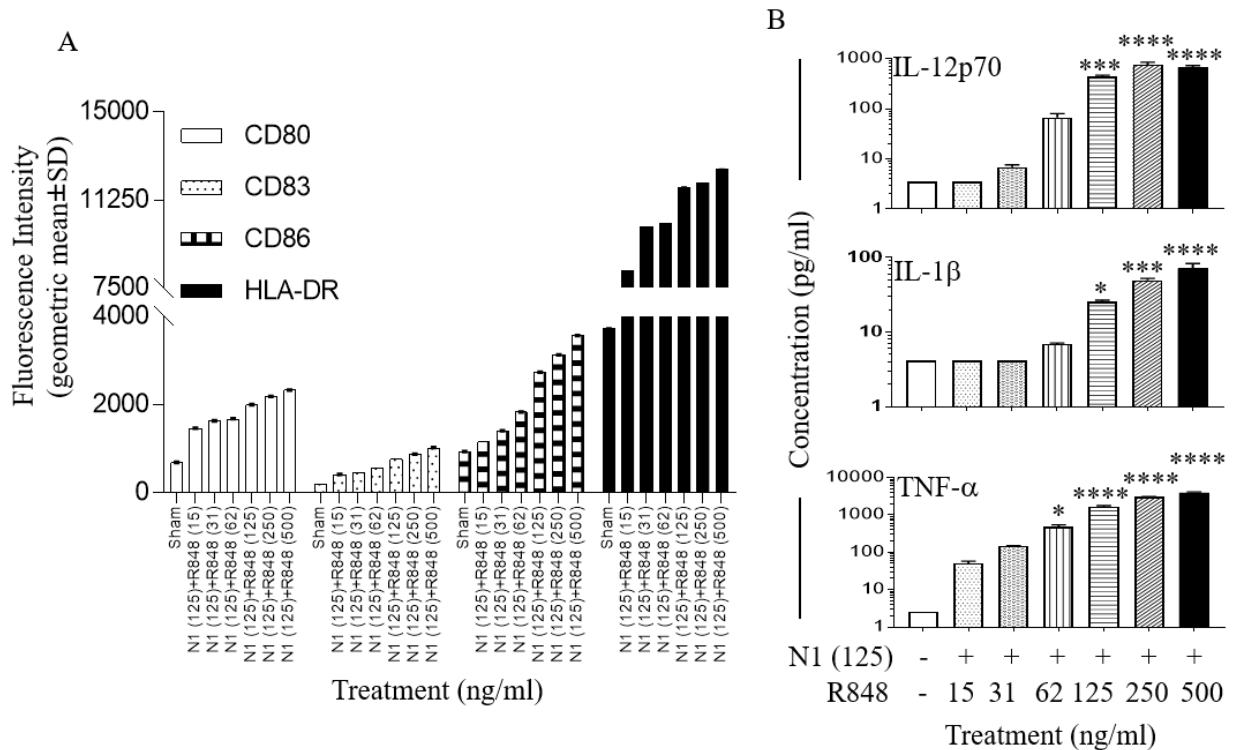

11

12

13 **Figure S2.** N1 and R848 synergistically induce phenotypic maturation of human MoDCs. Human  
 14 MoDCs were incubated at  $5 \times 10^5$  cells/ml in the absence (sham) or presence of N1 (125 ng/ml)  
 15 and R848 (15 to 500 ng/ml) for 48 h before (A) they were immuno-stained and analyzed by flow  
 16 cytometry for the expression of the indicated surface molecules (geometric mean fluorescence  
 17 intensity  $\pm$  SD from three donors). (B) cytokine levels in triplicate culture supernatants of one  
 18 representative experiment of three performed from three donors with similar results were  
 19 quantitated by cytokine array (mean  $\pm$  SD).  $p < 0.05$  is considered statistically significant when

1 compared with sham treatment. \* $p < 0.05$ , \*\*\* $p < 0.001$ , and \*\*\*\* $p < 0.0001$  according to one-  
 2 way ANOVA followed by Tukey's post hoc test.  
 3

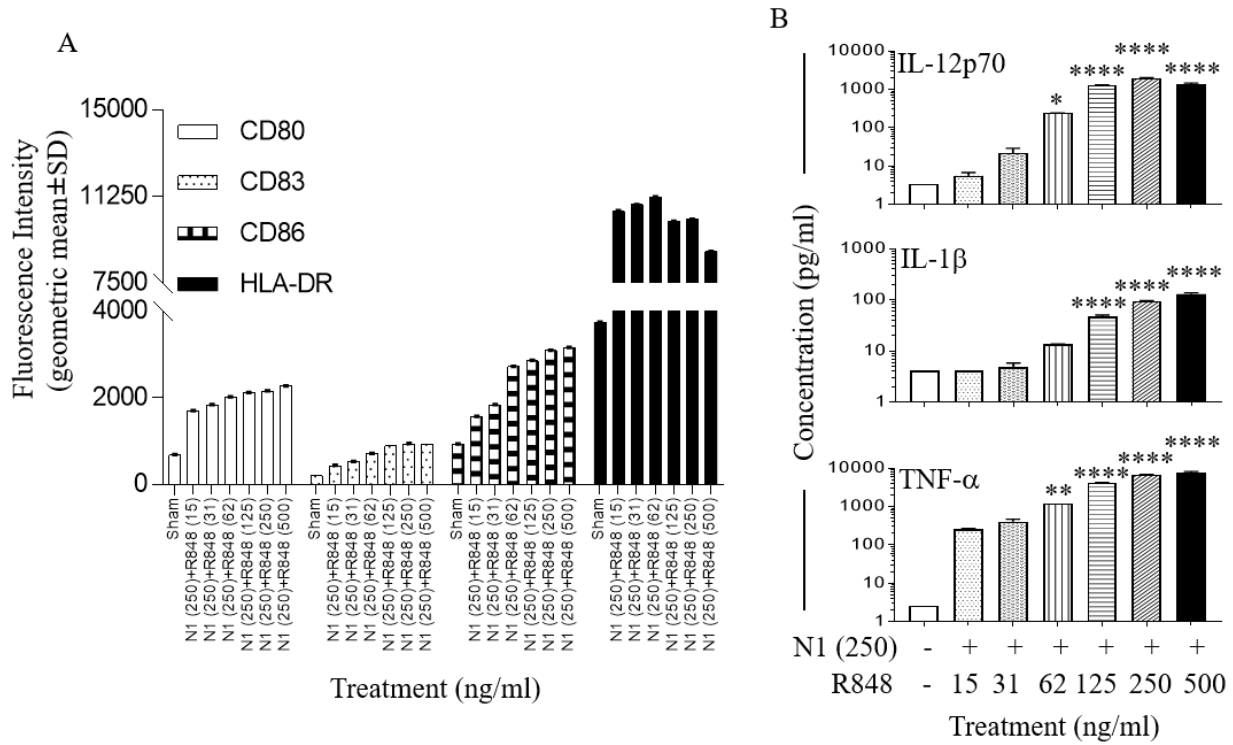

4  
 5  
 6 **Figure S3.** N1 and R848 synergistically induce phenotypic maturation of human MoDCs. Human  
 7 MoDCs were incubated at  $5 \times 10^5$  cells/ml in the absence (sham) or presence of N1 (250 ng/ml)  
 8 and R848 (15 to 500 ng/ml) for 48 h before (A) they were immuno-stained and analyzed by flow  
 9 cytometry for the expression of the indicated surface molecules (geometric mean fluorescence  
 10 intensity  $\pm$  SD from three donors). (B) cytokine levels in triplicate culture supernatants of one  
 11 representative experiment of three performed from three donors with similar results were  
 12 quantitated by cytokine array (mean  $\pm$  SD).  $p < 0.05$  is considered statistically significant when  
 13 compared with sham treatment. \* $p < 0.05$ , \*\* $p < 0.01$ , and \*\*\*\* $p < 0.0001$  according to one-way  
 14 ANOVA followed by Tukey's post hoc test.  
 15  
 16

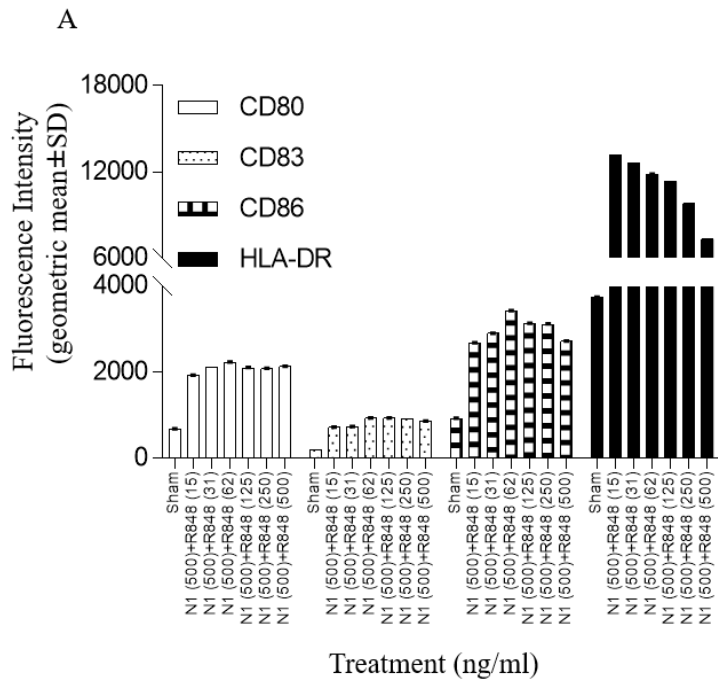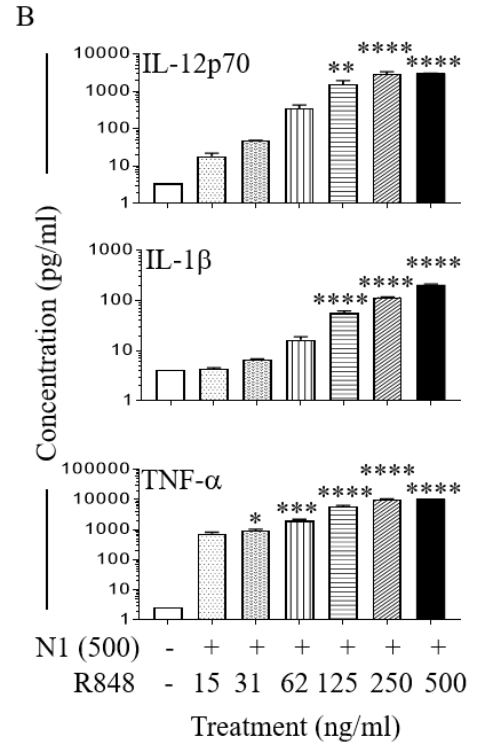

1  
2  
3  
4  
5  
6  
7  
8  
9  
10  
11  
12  
13

**Figure S4.** N1 and R848 synergistically induces phenotypic maturation of human MoDCs. Human MoDCs were incubated at  $5 \times 10^5$  cells/ml in the absence (sham) or presence of N1 (500 ng/ml) and R848 (15 to 500 ng/ml) for 48 h before (A) they were immuno-stained and analyzed by flow cytometry for the expression of the indicated surface molecules (geometric mean fluorescence intensity  $\pm$  SD from three donors). (B) cytokine levels in triplicate culture supernatants of one representative experiment of three performed from three donors with similar results were quantitated by cytokine array (mean  $\pm$  SD).  $p < 0.05$  is considered statistically significant when compared with sham treatment. \* $p < 0.05$ , \*\* $p < 0.01$ , \*\*\* $p < 0.001$  and \*\*\*\* $p < 0.0001$  according to one-way ANOVA followed by Tukey's post hoc test.

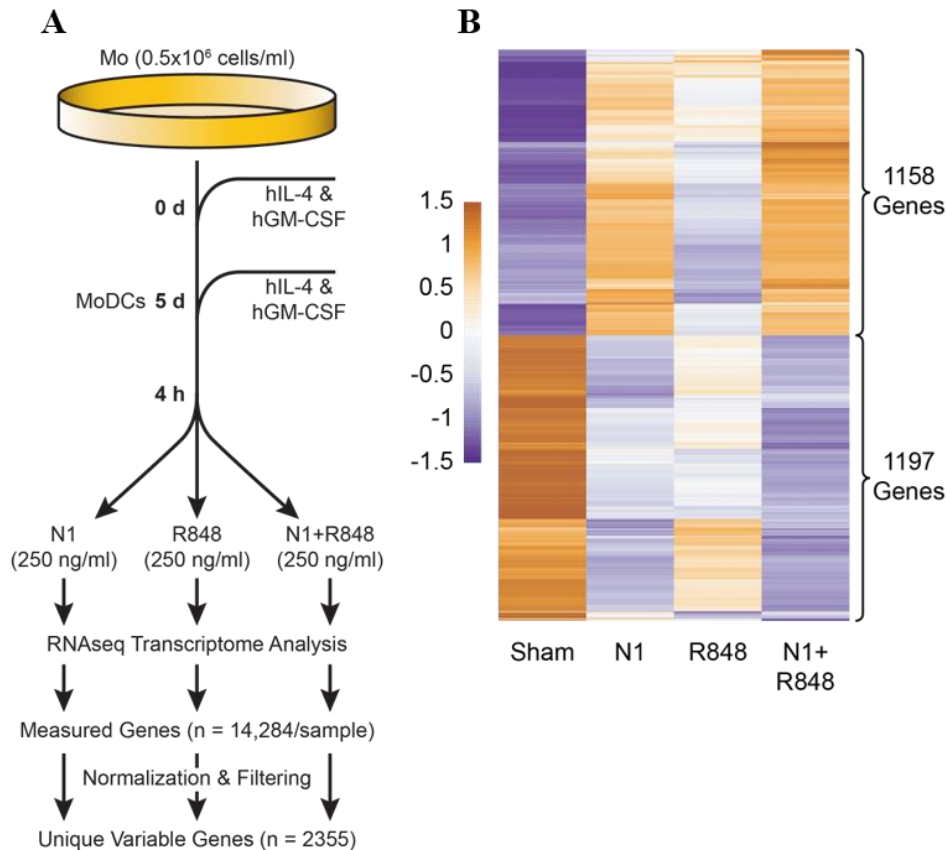

1  
2 **Figure S5.** Response to N1 and R848 as revealed by RNA-seq analysis. **(A)** Workflow of RNA-  
3 seq analysis of MoDCs from three donors. MoDCs from each donor were prepared as described  
4 in manuscript and treated with N1, R848, and N1 plus R848, as well as sham. **(B)** Heat map  
5 showing the expression of 2,355 unique genes found to be variable in experimental treatments  
6 relative to sham. Expression values in these heat maps are  $\log_2$ -transformed, TMM-normalized  
7 counts-per-million (CPM). Orange shows relatively high expression while purple shows relatively  
8 low expression. Row centering and unit variance scaling have been applied. Rows are clustered  
9 using Euclidean distances and complete linkage.

10

11

12

13

14

1 **Supplementary Table S1.** qPCR primers for human and mouse cytokine genes.

2

| Target genes          | Catalog       | Reference |
|-----------------------|---------------|-----------|
| Human IFN- $\alpha$ 2 | PPH00379A-200 | NM_000605 |
| Human IFN- $\alpha$ 4 | PPH01067B-200 | NM_021068 |
| Human IFN- $\beta$ 1  | PPH00384F-200 | NM_002176 |
| Human IL-1 $\beta$    | PPH00171C-200 | NM_000576 |
| Human TNF- $\alpha$   | PPH00341F-200 | NM_000594 |
| Human IL-12p40        | PPH00545A-200 | NM_002187 |
| Human $\beta$ -actin  | PPH00073G-200 | NM_001101 |
| Mouse IFN- $\beta$ 1  | PPM03594C-200 | NM_010510 |
| Mouse $\beta$ -actin  | PPM02945B-200 | NM_007393 |

3 The qPCR primers were obtained from Qiagen.

4
